# Supplementary material
Source: publisher figshare collection journal article supplement (https://geolsoc.figshare.com/ndownloader/files/27340165)
Supplement: Supplementary file 1 [file 27340165]

## Sheet: Sheet3
Table S1 Calculated modal composition of point-count data from Carboniferous sandstones in the Darbut region.
Formation name	Sample	Quartz	Feldspar	Lithic fragments
				Silicolite	Amphibolite	Augite	Mica	Tuff	Sandstone	Basalt	Andesite	Granite	Carbonate
Xibeikulasi Formaiton	xb-1	116	345	16	2	0	3	53	18	20	88	13	0
	xb-2	80	242	12	14	0	5	73	87	25	67	8	0
	xb-3	78	265	5	3	0	3	25	3	3	15	0	0
	xb-4	107	292	8	9	2	1	13	3	4	25	1	0
	xb-6	88	346	4	21	1	6	22	6	5	45	6	0
	xb-7	64	250	4	25	6	2	41	6	5	53	7	0
	xb-13	44	252	4	9	0	1	32	6	19	68	1	0
	xb-15	29	347	5	22	2	1	22	0	6	18	1	0
	xb-20	25	287	8	19	2	3	35	13	19	61	0	0
	xb-25	58	185	9	31	5	3	58	12	9	76	8	0
	xb-27	28	231	6	24	6	3	79	17	27	81	15	0
	xb-36	36	336	2	3	0	1	19	2	6	17	1	0
Baogutu Formation	bg-1	12	192	0	19	13	0	51	33	9	100	0	0
	bg-21	9	169	0	0	0	0	89	31	13	59	0	33
	bg-33	15	176	0	0	0	0	114	24	6	61	0	23
